# Supplementary material for: Metabolomics-Based Screening of Biofilm-Inhibitory Compounds against Pseudomonas aeruginosa from Burdock Leaf
Source: PubMed Central journal article supplement (PMC6331861; doi:10.3390/molecules200916266), 2015-09-08
Supplement: molecules-20-16266-s001.pdf [file molecules-20-16266-s001.pdf]

# Supplementary Materials

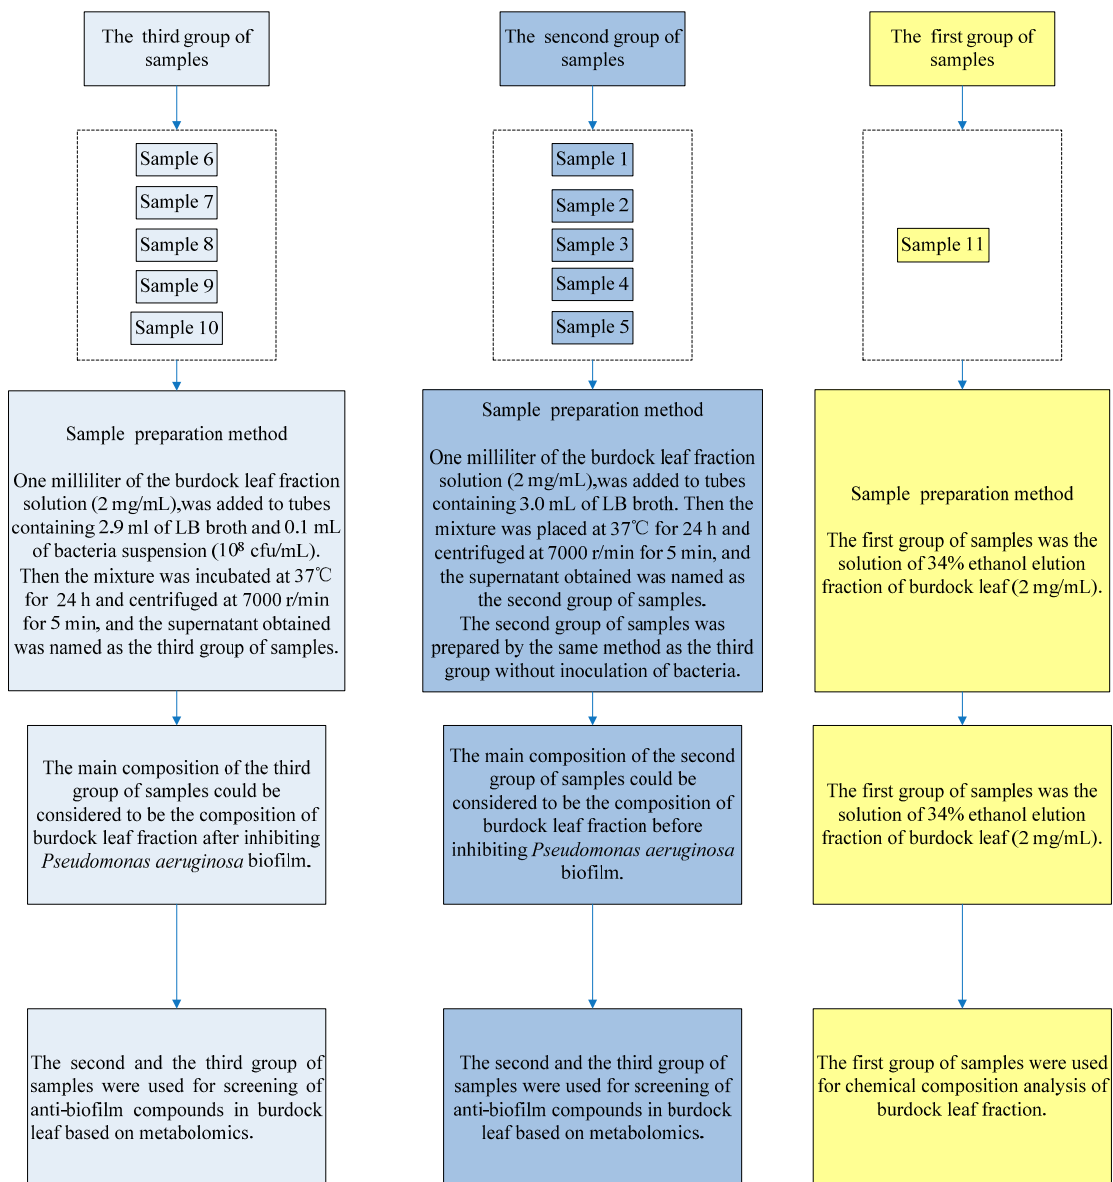

**Figure S1.** Samples preparation methods and sample groups.

**Table S1.** Peaks (ion  $t_R$ - $m/z$  pair points) with significant reduction of area.

| Number | Retention Time | Mass     | APACA2   | APACA3   | VIP     |
|--------|----------------|----------|----------|----------|---------|
| 1      | 10.7922        | 431.1973 | 149.3706 | 48.09534 | 1.16476 |
| 2      | 12.8307        | 345.1053 | 146.011  | 46.95214 | 1.16517 |
| 3      | 13.7507        | 187.1016 | 83.8051  | 20.65404 | 1.16598 |
| 4      | 13.0333        | 462.2222 | 61.2066  | 2.861    | 1.16657 |
| 5      | 12.1489        | 331.1315 | 65.777   | 17.88796 | 1.16365 |
| 6      | 8.2526         | 179.04   | 58.2216  | 12.61814 | 1.16438 |
| 7      | 12.6807        | 343.1146 | 57.6269  | 15.65608 | 1.15796 |
| 8      | 13.0522        | 515.1301 | 50.3402  | 5.81968  | 1.16292 |
| 9      | 13.219         | 449.1603 | 51.3319  | 12.7476  | 1.16711 |
| 10     | 10.7027        | 341.0997 | 50.73805 | 11.86934 | 1.16689 |
| 11     | 12.6042        | 449.1584 | 50.54455 | 13.48902 | 1.1626  |
| 12     | 13.4485        | 161.0638 | 48.365   | 9.75022  | 1.16484 |
| 13     | 10.4155        | 378.1972 | 46.1295  | 8.11206  | 1.16495 |
| 14     | 10.9224        | 465.1537 | 48.20445 | 12.25212 | 1.1591  |
| 15     | 12.6271        | 493.1866 | 47.05215 | 12.87938 | 1.16302 |
| 16     | 13.7375        | 125.1017 | 43.0998  | 10.24674 | 1.16314 |
| 17     | 13.8431        | 461.2509 | 43.588   | 13.30158 | 1.16271 |
| 18     | 12.2932        | 333.1465 | 42.2346  | 11.66186 | 1.16083 |
| 19     | 10.6824        | 345.1129 | 40.0473  | 10.5863  | 1.1629  |
| 20     | 10.7982        | 421.1728 | 39.82695 | 12.68882 | 1.15229 |
| 21     | 14.1265        | 477.1913 | 38.40615 | 9.9285   | 1.16309 |
| 22     | 10.4134        | 114.0594 | 36.38575 | 7.80678  | 1.16376 |
| 23     | 10.7658        | 385.1962 | 37.10785 | 10.64166 | 1.16366 |
| 24     | 13.2863        | 451.1743 | 35.204   | 9.29926  | 1.16157 |
| 25     | 12.2254        | 609.1527 | 33.7945  | 7.04942  | 1.16236 |
| 26     | 11.4927        | 461.2515 | 34.6727  | 9.83132  | 1.16285 |
| 27     | 12.8332        | 379.1497 | 29.5326  | 1.80134  | 1.16529 |
| 28     | 13.043         | 114.0595 | 28.92435 | 1.59552  | 1.16435 |
| 29     | 13.8714        | 243.1289 | 30.87175 | 5.441    | 1.16091 |
| 30     | 10.6735        | 323.1325 | 32.9918  | 10.11388 | 1.15403 |
| 31     | 11.9171        | 465.152  | 31.2695  | 7.9291   | 1.1526  |
| 32     | 13.0533        | 353.0954 | 27.4747  | 2.19184  | 1.15546 |
| 33     | 12.6058        | 427.2063 | 32.21225 | 10.5928  | 1.16434 |
| 34     | 14.5251        | 491.1675 | 28.89495 | 6.1879   | 1.15801 |
| 35     | 10.8742        | 281.1435 | 29.56155 | 8.09338  | 1.16617 |
| 36     | 11.603         | 449.2522 | 29.118   | 8.29244  | 1.16556 |
| 37     | 13.4472        | 205.0572 | 26.8918  | 4.4431   | 1.16363 |
| 38     | 11.7734        | 431.2009 | 28.9007  | 8.1828   | 1.16193 |
| 39     | 11.0986        | 495.202  | 27.91205 | 7.17914  | 1.15157 |
| 40     | 13.3638        | 333.1464 | 27.2168  | 6.94594  | 1.16145 |
| 41     | 12.5955        | 473.2154 | 27.86445 | 8.80852  | 1.16056 |

**Table S1.** *Cont.*

| <b>Number</b> | <b>Retention Time</b> | <b>Mass</b> | <b>APACA2</b> | <b>APACA3</b> | <b>VIP</b> |
|---------------|-----------------------|-------------|---------------|---------------|------------|
| 42            | 11.4214               | 319.1276    | 25.11335      | 5.93506       | 1.155      |
| 43            | 10.3068               | 363.087     | 24.49825      | 5.52614       | 1.15936    |
| 44            | 14.1176               | 973.5215    | 22.8987       | 4.7582        | 1.16324    |
| 45            | 14.4314               | 243.1283    | 20.1257       | 4.07526       | 1.15807    |
| 46            | 13.5119               | 231.1266    | 18.4781       | 2.6985        | 1.16065    |
| 47            | 11.0125               | 473.2161    | 19.3952       | 5.16984       | 1.16118    |
| 48            | 13.4496               | 117.0752    | 18.591        | 3.7141        | 1.16652    |
| 49            | 12.223                | 495.2052    | 18.62465      | 4.98698       | 1.16556    |
| 50            | 10.8356               | 243.18      | 16.40205      | 1.77508       | 1.15695    |
| 51            | 13.4626               | 461.2476    | 17.2381       | 4.78772       | 1.15959    |
| 52            | 10.628                | 177.0602    | 15.17925      | 3.04924       | 1.16534    |
| 53            | 13.8488               | 333.1483    | 14.56275      | 2.67206       | 1.16017    |
| 54            | 14.2355               | 431.208     | 13.2235       | 0.84918       | 1.15406    |
| 55            | 3.4633                | 187.1128    | 16.39245      | 6.66522       | 1.15678    |
| 56            | 12.7324               | 333.1484    | 14.16585      | 2.56634       | 1.15103    |
| 57            | 9.2448                | 177.0597    | 13.62345      | 2.73928       | 1.16288    |
| 58            | 12.486                | 413.1626    | 14.0164       | 3.7563        | 1.15809    |
| 59            | 12.2016               | 431.2017    | 12.50935      | 3.41674       | 1.15955    |
| 60            | 13.5154               | 515.133     | 12.1929       | 3.52052       | 1.16232    |
| 61            | 11.6032               | 167.0271    | 10.49265      | 0.5055        | 1.15523    |
| 62            | 12.8928               | 593.1629    | 11.79985      | 2.75446       | 1.16491    |
| 63            | 11.9434               | 461.2498    | 11.98195      | 3.61658       | 1.15584    |
| 64            | 10.8005               | 225.0674    | 11.98195      | 3.68714       | 1.1641     |
| 65            | 13.6679               | 973.5202    | 11.10355      | 2.57788       | 1.14869    |
| 66            | 14.2177               | 423.1756    | 10.89925      | 2.08334       | 1.16725    |
| 67            | 13.2068               | 405.1854    | 10.792        | 2.16862       | 1.16124    |
| 68            | 10.7888               | 499.1982    | 10.4078       | 1.998         | 1.16465    |
| 69            | 13.8146               | 151.0067    | 11.08145      | 3.60096       | 1.15298    |
| 70            | 11.4468               | 401.1962    | 10.2198       | 2.5611        | 1.157      |
| 71            | 12.6073               | 463.1854    | 10.6113       | 3.32776       | 1.16295    |
| 72            | 12.8344               | 465.1562    | 10.6966       | 3.59636       | 1.16249    |
| 73            | 10.9081               | 119.0509    | 10.0748       | 2.57582       | 1.1649     |
| 74            | 11.258                | 431.1647    | 9.25265       | 1.67326       | 1.15308    |
| 75            | 13.6752               | 227.1329    | 9.16445       | 1.7221        | 1.16355    |
| 76            | 12.9326               | 505.1444    | 9.43115       | 2.70704       | 1.15159    |
| 77            | 14.0139               | 225.1202    | 9.2104        | 2.25728       | 1.16666    |
| 78            | 13.3167               | 287.0284    | 8.0005        | 1.6131        | 1.15908    |
| 79            | 14.8257               | 301.0433    | 7.28355       | 2.40472       | 1.15783    |
| 80            | 10.4912               | 465.1559    | 6.8645        | 1.90422       | 1.1641     |
| 81            | 21.0689               | 455.3725    | 3.5295        | 0.54688       | 1.1502     |

These peaks represented the compounds with anti-biofilm activity potential. APACA2: Average peak area of compounds in sample Group 2. APACA3: Average peak area of compounds in sample Group 3. VIP: Variable importance in projection.
